# Supplementary material for: Veterinary Interventions to Improve Neonatal Survival on British Beef and Sheep Farms: A Qualitative Study
Source: Frontiers journal article supplement (doi:10.3389/fvets.2021.619889), 2021-02-04
Supplement: Data_Sheet_1.PDF [file Data_Sheet_1.PDF]

# Farmer Interview Schedule

AHDB Project: Development of an integrated neonatal survival and sustainable antibiotic plan

| Introduction                                                                        |                                                                                                                                                                                                                                               |
|-------------------------------------------------------------------------------------|-----------------------------------------------------------------------------------------------------------------------------------------------------------------------------------------------------------------------------------------------|
| Tell me a bit about the farm                                                        | Particularly your beef suckler herd/sheep flock e.g. breed, numbers, pedigree/commercial.<br>What sort of lambing/calving system do you have? What lambing/calving pattern? Indoor or outdoor? Staff?                                         |
| How would you define “neonatal” losses?                                             | Up to what age? Would you include stillbirths?<br>Why?                                                                                                                                                                                        |
| Talk me through a typical neonatal loss in your herd/flock                          | (How does this differ between cattle and sheep?)                                                                                                                                                                                              |
| Current practices                                                                   |                                                                                                                                                                                                                                               |
| What do you do to avoid neonatal losses in your herd/flock?                         | Before, during and after birth<br>Housing and/or environment<br>Preventive vs. reactive – what triggers action?<br>Information sources?                                                                                                       |
| How does your vet help you to minimise neonatal losses?                             | Vaccination; medication (antibiotics); herd health/advisory role; post mortems                                                                                                                                                                |
| Do you record data on neonatal losses?                                              | Why/why not? How (paper, electronic)?<br>Any analysis (by you or your vet)?<br>What do you do as a result? Does it make a difference?                                                                                                         |
| Drivers and barriers                                                                |                                                                                                                                                                                                                                               |
| How much of a problem are neonatal losses in your herd/flock?                       | Has this changed over time?<br>What problems does it cause for the business? For you?<br>How do you feel when you lose a calf/lamb?                                                                                                           |
| What motivates you to reduce neonatal losses?                                       | Benefits of reducing neonatal losses? For your business? For you?<br>How much influence do you feel that you have on neonatal survival in your herd/flock? How much is it down to luck?                                                       |
| What are the main challenges of reducing neonatal losses in your herd/flock?        | Are there other actions that you would like to take to increase neonatal survival in your herd/flock, but don't at present?<br>What are the barriers to taking these additional actions?<br>What would help you to overcome these challenges? |
| Conclusions                                                                         |                                                                                                                                                                                                                                               |
| What do you think would make the biggest difference to improving neonatal survival? | In your herd/flock?<br>In the UK beef/sheep industry as a whole?                                                                                                                                                                              |
| What additional research and/or technology is needed to reduce neonatal losses?     | Do you have any personal experience of these innovations?<br>What difference would this make to neonatal survival?                                                                                                                            |

# Vet Interview Schedule

AHDB Project: Development of an integrated neonatal survival and sustainable antibiotic plan

| Introduction                                                                                     |                                                                                                                                                                                                                                                                                                                          |
|--------------------------------------------------------------------------------------------------|--------------------------------------------------------------------------------------------------------------------------------------------------------------------------------------------------------------------------------------------------------------------------------------------------------------------------|
| Tell me about your current role in the practice.                                                 | How much beef/sheep work do you do?<br>What proportion of your clients have beef cattle, sheep, or both?                                                                                                                                                                                                                 |
| How would you define “neonatal” losses?                                                          | Up to what age? Would you include stillbirths?                                                                                                                                                                                                                                                                           |
| How much of a problem are neonatal losses in your clients’ herds/flocks?                         | Has this changed over time? How does this vary between herds/flocks? Is it different for beef herds and sheep flocks? What sort of problems does it cause for their business? For them? For you?                                                                                                                         |
| Current practices                                                                                |                                                                                                                                                                                                                                                                                                                          |
| What do you do to help your clients avoid neonatal losses in their herd/flock?                   | Reactive “fire-fighting” role – addressing problems<br>Preventative/advisory role: Before, during and after birth.<br>Vaccination.<br>How are antibiotics used to minimise losses (vet/client)?<br>Where do you get information about reducing neonatal losses?<br>How do you share this information with your clients?  |
| Do your clients record data on neonatal losses in their herd/flock?                              | Why do you think they do this (or not)?<br>How do they record losses (e.g. paper, electronic)? Do you do any data recording? Do you use a post mortem service?<br>What do you do with these data? Do you do any analysis? Does your client?<br>What do you do as a result? Does it make a difference to neonatal losses? |
| Drivers and barriers                                                                             |                                                                                                                                                                                                                                                                                                                          |
| What motivates you to help clients to reduce neonatal losses in their herds/flocks?              | How does it affect you personally when losses occur?<br>What are the benefits of reducing neonatal losses:<br>- for your clients? For you?<br>What do you think motivates your clients to reduce neonatal losses?                                                                                                        |
| How much influence do you feel that you have on neonatal survival in your clients’ herds/flocks? | What strategies do you use to change their behaviour?<br>How much is it down to luck?                                                                                                                                                                                                                                    |
| What are the main challenges in reducing neonatal losses in your clients’ herds/flocks?          | Are there other actions that you would like your clients to take to increase neonatal survival in their herd/flock, but don’t at present?<br>What are the barriers to taking these additional actions?<br>What would help you to overcome these challenges?                                                              |
| Conclusions                                                                                      |                                                                                                                                                                                                                                                                                                                          |
| What do you think would make the biggest difference to improving neonatal survival?              | In your clients’ herds/flocks?<br>In the UK cattle/sheep industry as a whole?                                                                                                                                                                                                                                            |
| What additional research and/or technology is needed to reduce neonatal losses?                  | Do you have any personal experience of these innovations?<br>What difference would they make to neonatal survival?                                                                                                                                                                                                       |
